# Supplementary material
Source: PubMed Central journal article supplement (PMC7040957)
Supplement: NIHMS1556769-supplement-SI.pdf [file NIHMS1556769-supplement-SI.pdf]

# Supporting Information

## Calcium ions directly interact with the Ebola virus fusion peptide to promote structure-function changes that enhance infection

Lakshmi Nathan<sup>1‡</sup>, Alex L. Lai<sup>2‡</sup>, Jean Kaoru Millet<sup>3</sup>, Marco R. Straus<sup>3</sup>, Jack H. Freed<sup>2\*</sup>, Gary R. Whittaker<sup>3\*</sup>, Susan Daniel<sup>1\*</sup>

1. Robert Frederick Smith School of Chemical and Biomolecular Engineering, Cornell University, Ithaca, NY, 14853
2. Department of Chemistry and Chemical Biology, Cornell University, Ithaca, NY, 14853
3. Department of Microbiology and Immunology, Cornell University, Ithaca, NY, 14853

This document contains the supplementary figures for the article listed above, on 12 consecutive pages.

Figure list:

- 1) Raw data from infectivity studies for WT EBOV pseudovirus and non-infectious control
- 2) Western blot confirming incorporation of WT GP and mutated GP into pseudovirus
- 3) Raw data from infectivity study comparing WT and mutated GP
- 4) Structure of spin-labeled lipids
- 5) Ordering effects of long vs. short FP
- 6) Ordering effects of WT FP vs mutated FP as a function of peptide to lipid ratio
- 7) ESR spectra of pseudovirus/lipid mixture
- 8) Western blot confirming removal of mucin cap from pseudovirus GP
- 9) Lipid mixing data from pseudovirus/lipid mixture
- 10) Helical contents (%) vs  $\text{Ca}^{2+}$  concentration based on CD spectroscopy.

a)

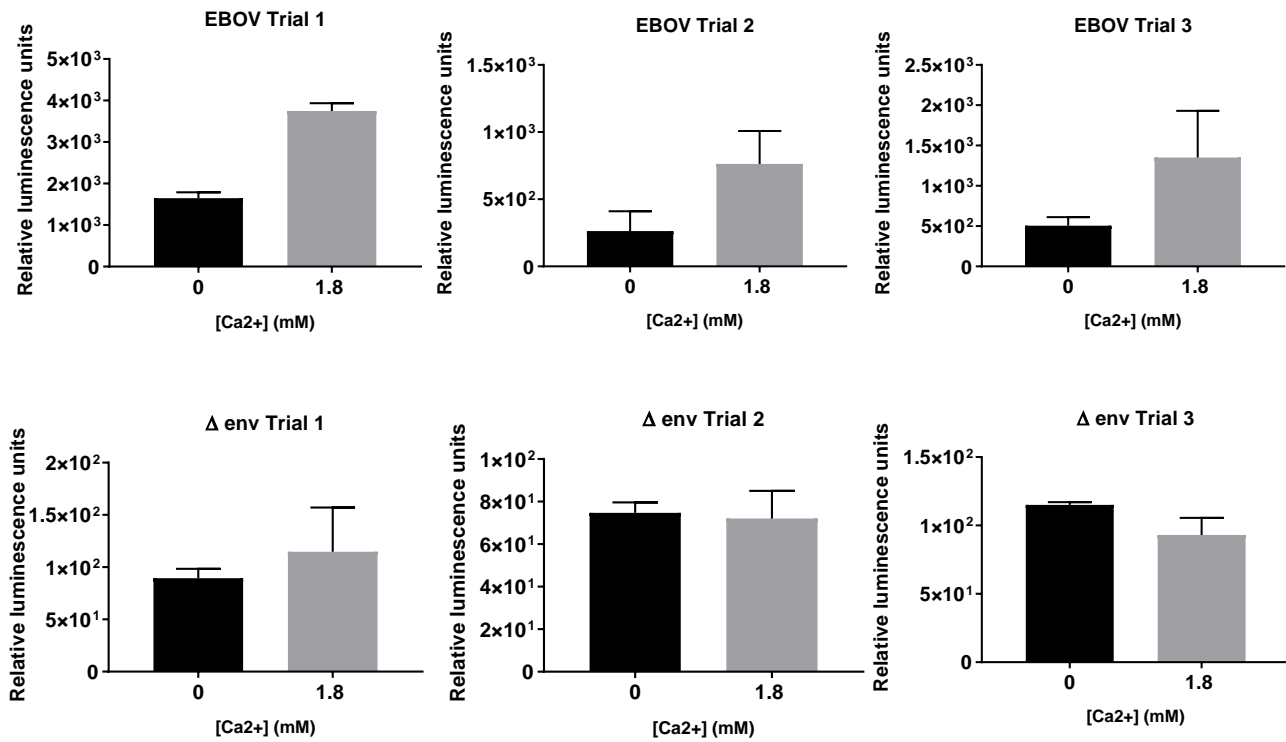

b)

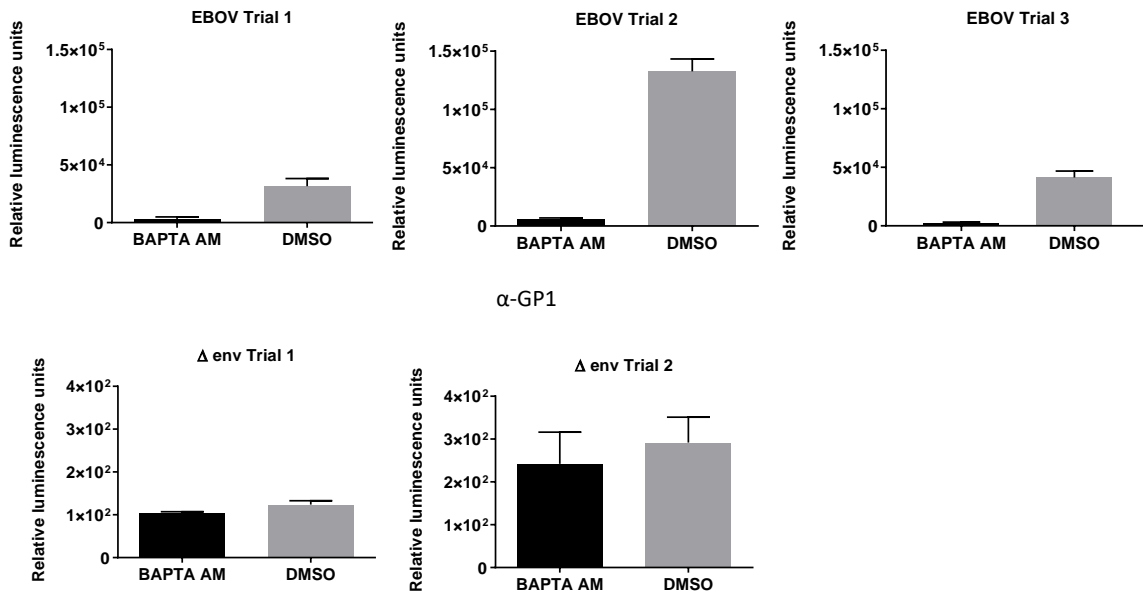

**Fig. S1.** Raw data of a) extracellular and b) intracellular calcium experiments. Δ env is a pseudotyped virus that lacks a spike protein and thus serves as a non-infectious negative control. It is produced by omitting the spike protein plasmid during transfection of HEK 293T cells for pseudotyped virus production. Error bars represent s.d. among 3 technical replicates. Note the difference in scale between graphs.

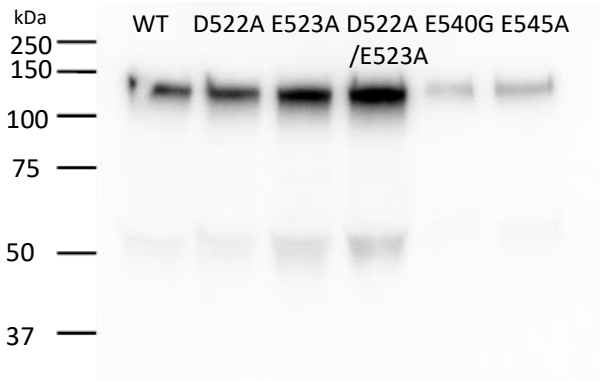

**Fig. S2.** Western blot confirming incorporation of WT and mutated GP into pseudotyped virus particles. Supernatant from transfected cells was harvested 48 h post-transfection, filtered through a 0.45  $\mu\text{m}$  membrane, and stored at  $-80^{\circ}\text{C}$ . After thawing from  $-80^{\circ}\text{C}$ , particles were pelleted at 42000 rpm and resuspended in 30  $\mu\text{L}$  PBS to concentrate the sample prior to blotting.

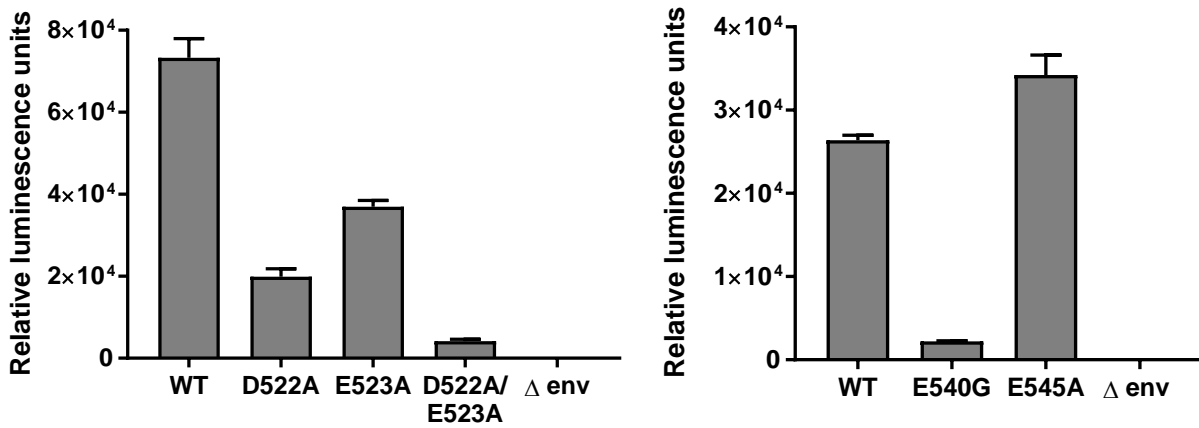

**Fig. S3.** Infectivity of mutant GP pseudotyped virus and non-infectious control ( $\Delta$  env). Error bars indicate s.d. among 3 technical replicates from testing the same batch of virus.

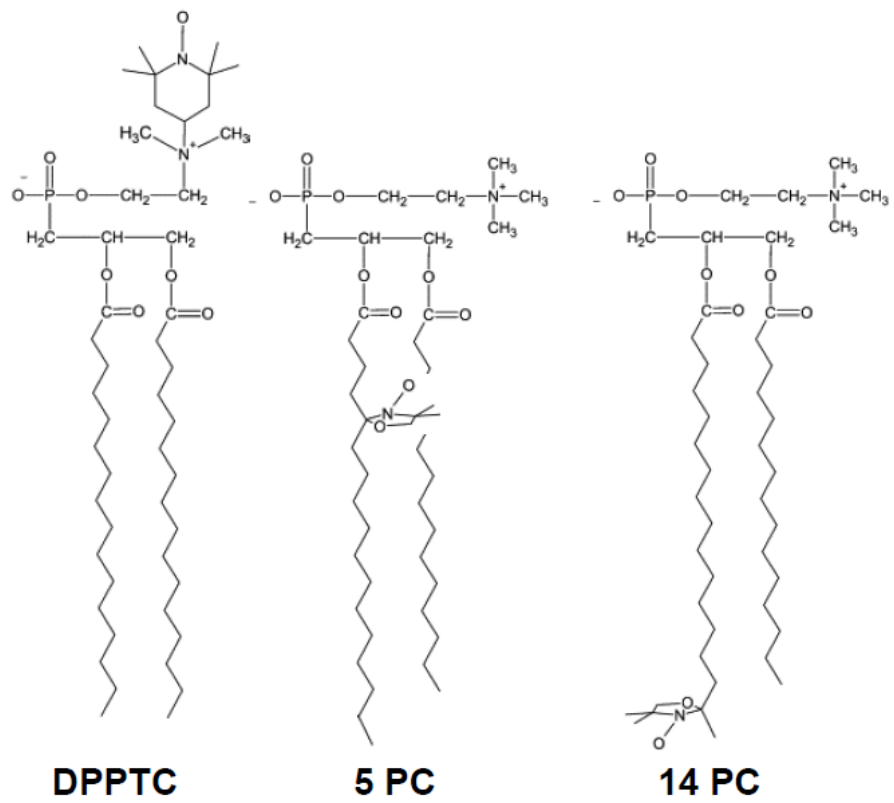

**Fig. S4.** Structure of spin labeled lipids used in this study.

Long FP 501-560

G S I E G R A Q P K C N P N L H Y W T T Q D E **G A A I G L A**  
**W I P Y F G P A A** E G I Y I E G L M H N Q D G L I C G L R Q

Short FP 524-539

G A A I G L A W I P Y F G P A A

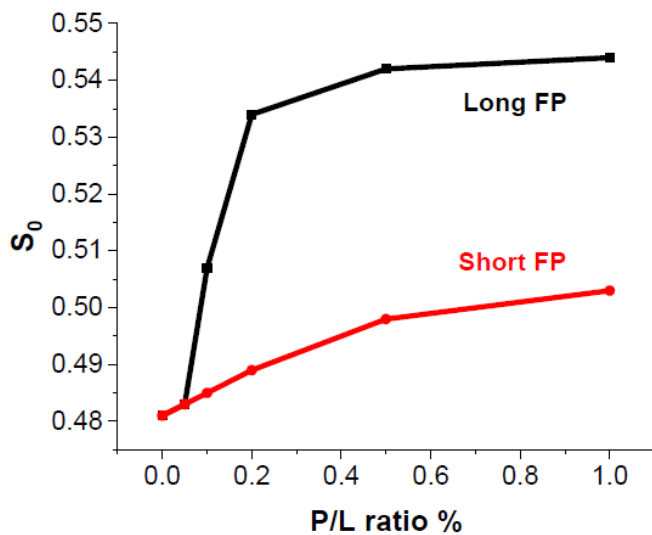

**Fig. S5.** The long FP has a stronger ordering effect than the short FP. Plot of order parameter ( $S_0$ ) of DPPTC versus peptide:lipid ratio (P/L ratio) of FP.

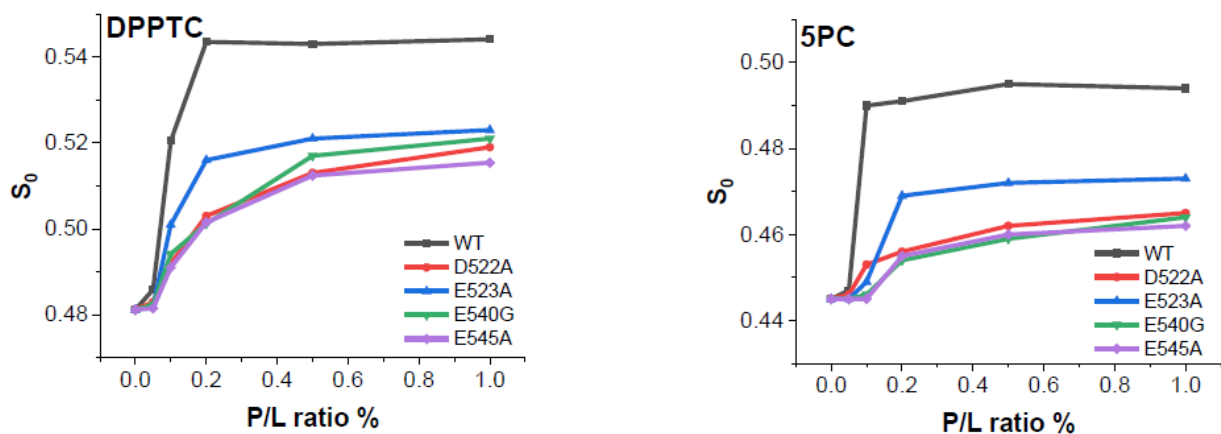

**Fig. S6.** Comparing the membrane ordering effects of the WT and mutant EBOV FPs on DPPTC (left) and 5PC (right) as a function of peptide:lipid ratio (P/L ratio). Black, WT FP; red, D522A; blue, E523A; green, E540G; purple, E545A.

**Fig S7A**

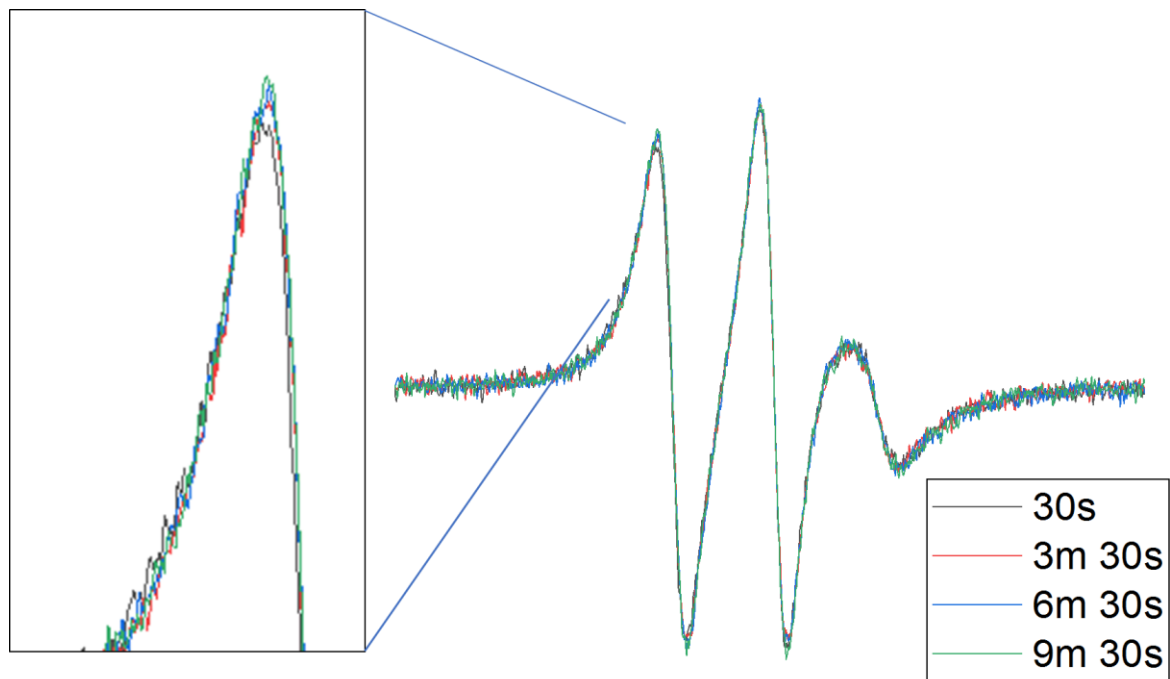

**Fig S7B**

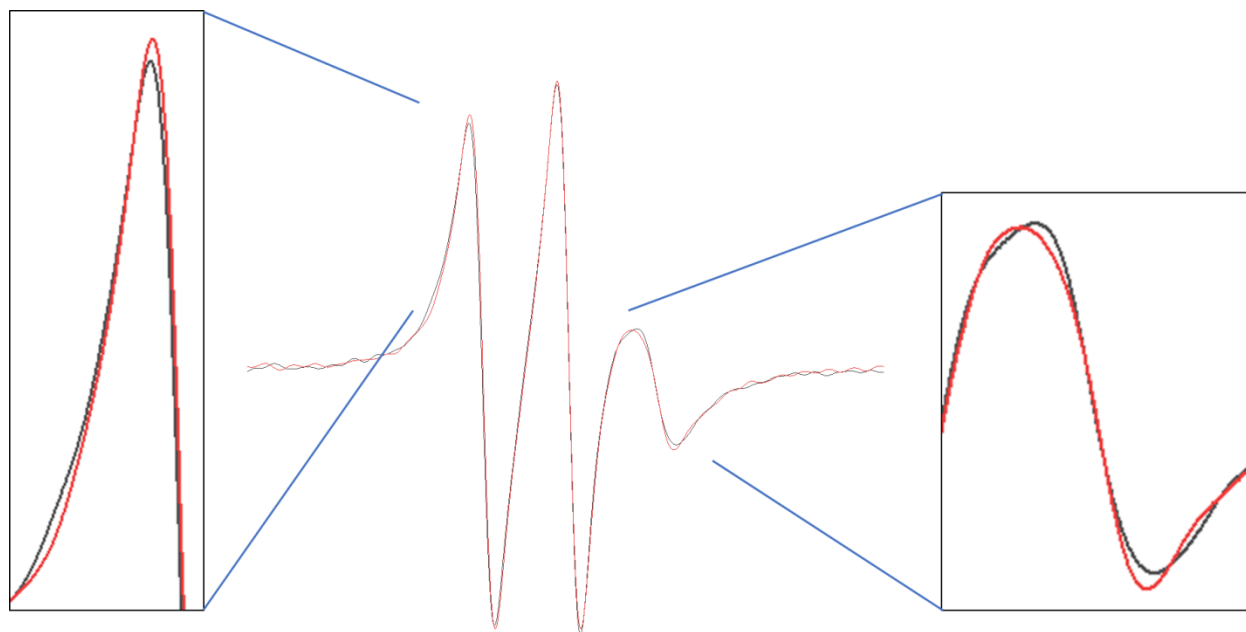



Fig S7C

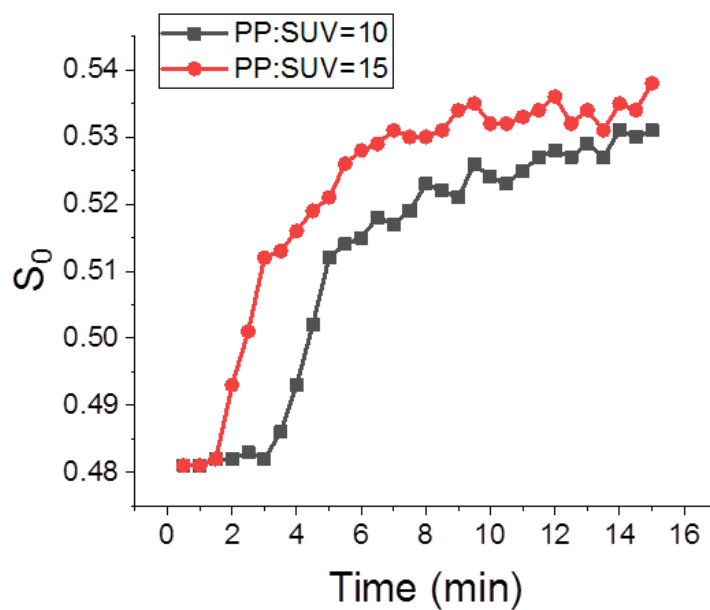

**Fig. S7.** (A) The shape of ESR curves of DPPTC on SUV change after the activation by acidification in the SUV:PP mixture. Black, collected at 0.5 min, red, at 3.5 min, blue, at 6.5 min, and green at 9.5 min. (B) after Wavelet Denoising, the change is more obvious, black, collected at 0.5 min, red, at 3.5 min. (C) the plot of  $S_0$ -time, showing the “jump” time is related to the PP:SUV ratio. Black, PP:SUV=10, red, PP:SUV=15.

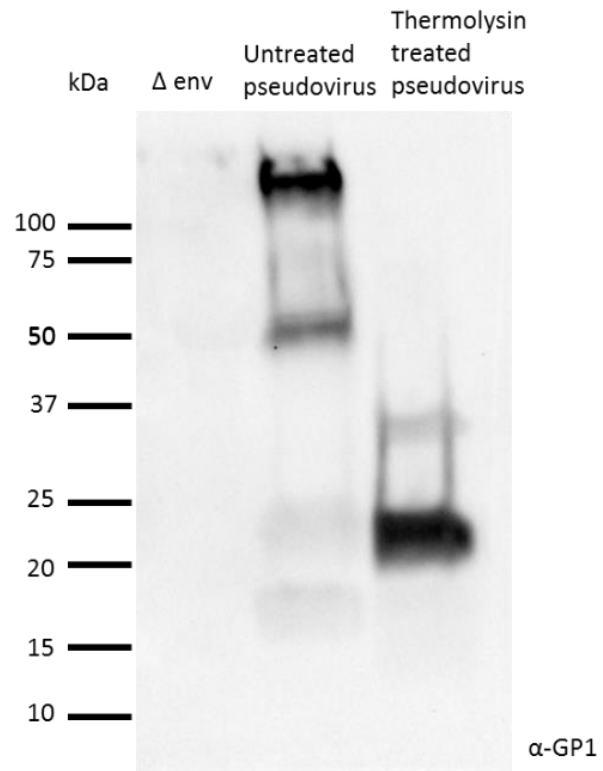

**Fig. S8.** Treatment with thermolysin removes the glycan cap.

## Pseudovirus-mediated lipid mixing

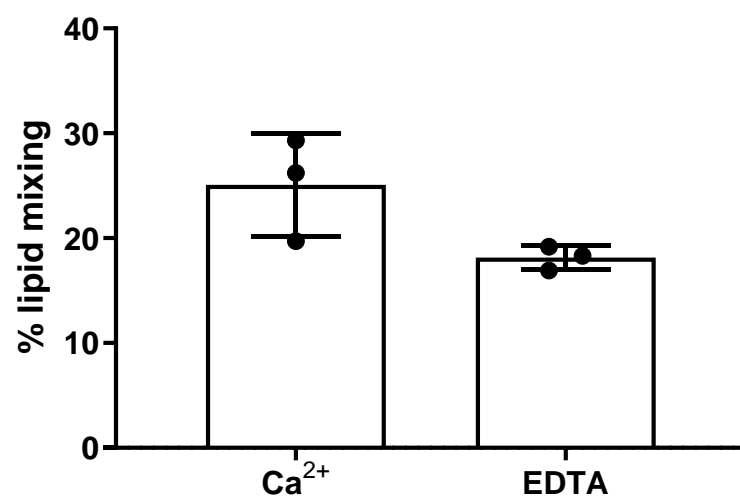

**Fig. S9.** Lipid mixing mediated by pseudovirus.

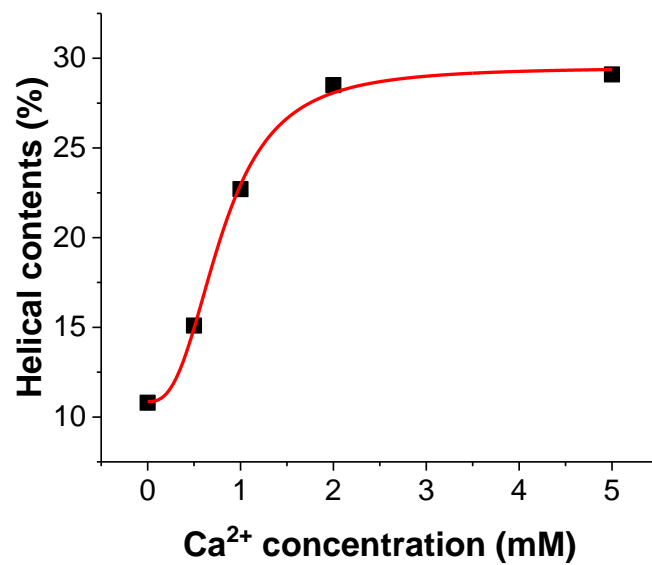

**Fig. S10.** Helical contents (%) vs. Ca<sup>2+</sup> concentration based on CD spectroscopy. The red line is a fit to the logistic function equation.
